# Supplementary material for: Origin of New Lineages by Recombination and Mutation in Avian Infectious Bronchitis Virus from South America
Source: MDPI journal article supplement (doi:10.3390/v14102095), 2022-09-21
Supplement: s1 [file s1]

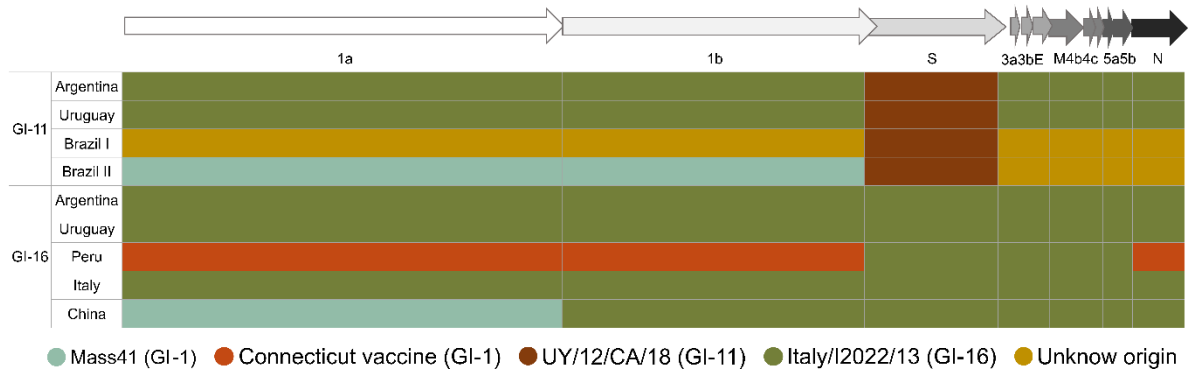

**Figure S1.** Genomic organization of the GI-16 and GI-11 strains. The ORFs analyzed are indicated with different shades of grey. The identity of each ORF is indicated for the different GI-11 and GI-16 strains according to their similarity with IBV reference genomes (shown with different colors).
